# Supplementary material for: Advance directives in European long-term care facilities: a cross-sectional survey
Source: PubMed Central journal article supplement — BMJ Support Palliat Care. 2019 May 21;12(e3):e393–402. doi: 10.1136/bmjspcare-2018-001743 (PMC9380512; doi:10.1136/bmjspcare-2018-001743), 2019-05-21
Supplement: bmjspcare-2018-001743supp001.pdf [file bmjspcare-2018-001743supp001.pdf]

## Annex 1.

Question regarding deceased resident's written advance directives in different languages, PACE Study 1 LTCF staff questionnaires, 2014.

England:

Did the resident have a written living will with regard to the following requests?(tick all that apply)

- do not resuscitate in case of a cardiac or respiratory arrest (DNR)
- do not transfer to a hospital
- discontinue the use of or do not use other treatments, please specify: .....
- request to try all life prolonging measures
- none of the above

Belgium:

Had de bewoner over volgende verzoeken een schriftelijke wilsverklaring?

(alles aankruisen wat van toepassing is)

- niet meer reanimeren in geval van een hart- en/of ademhalingsstilstand
- niet meer transfereren naar een ziekenhuis
- niet opstarten of stopzetten van andere behandelingen, namelijk: .....
- terminale sedatie (tot aan het overlijden continu buiten bewustzijn houden d.m.v. medicatie)
- euthanasie (toedienen van een levensbeëindigend middel op uitdrukkelijk verzoek van de bewoner)
- verzoek om alle levensverlengende maatregelen te proberen
- geen van bovenstaande

Finland:

Oliko asukas kirjannut/kirjauttanut hoitotahtonsa koskien yhtä tai useampaa vieressä olevaa vaihtoehtoa?

- elvyttämättä jättäminen (DNR)
- ei siirtoa sairaalaan
- keskeytettävä tai jätettävä aloittamatta hoitoja, mitä .....
- elämää pitkitettävä kaikin mahdollisin keinoin
- muu, mikä: .....
- ei mikään yllä olevista

## Italy:

Il paziente ha espresso in un documento scritto le sue volontà in merito alle seguenti richieste?  
(selezionare tutte le opzioni possibili)

- ordine di non essere rianimato in caso di arresto cardiaco (DNR)
- evitare il trasferimento in ospedale
- interrompere l'uso di o non sottoporre ad altri trattamenti (specificare):  
.....
- richiesta di impiegare tutte le misure volte a prolungare la vita
- nessuna delle risposte precedenti

## The Netherlands:

Had de bewoner over volgende verzoeken een schriftelijke wilsverklaring opgesteld? (alles aankruisen wat van toepassing is)

- behandelverbod
- volmacht
- euthanasieverklaring
- niet reanimeren verklaring/penning
- levenswensverklaring (NPV)
- andere wilsverklaring, namelijk: .....
- geen van bovenstaande

## Poland:

PL: Czy pacjent wyraził wcześniej na piśmie swoją wolę odnośnie następujących kwestii dotyczących leczenia? (proszę zaznaczyć wszystkie właściwe)

- Nie reanimować w przypadku zatrzymania krążenia/oddychania (DNR)
- Nie kierować do szpitala
- Nie kontynuować lub nie podejmować kolejnego leczenia, proszę określić jakiego:  
.....
- Prośba o podjęcie wszelkich środków w celu przedłużenia życia
- Żadne z powyższych
